# Supplementary material for: Global MicroRNA Profiling Uncovers miR-206 as a Negative Regulator of Hematopoietic Commitment in Human Pluripotent Stem Cells
Source: PubMed Central journal article supplement (PMC6479521; doi:10.3390/ijms20071737), 2019-04-08
Supplement: ijms-20-01737-s001.pdf [file ijms-20-01737-s001.pdf]

# Supplementary Materials

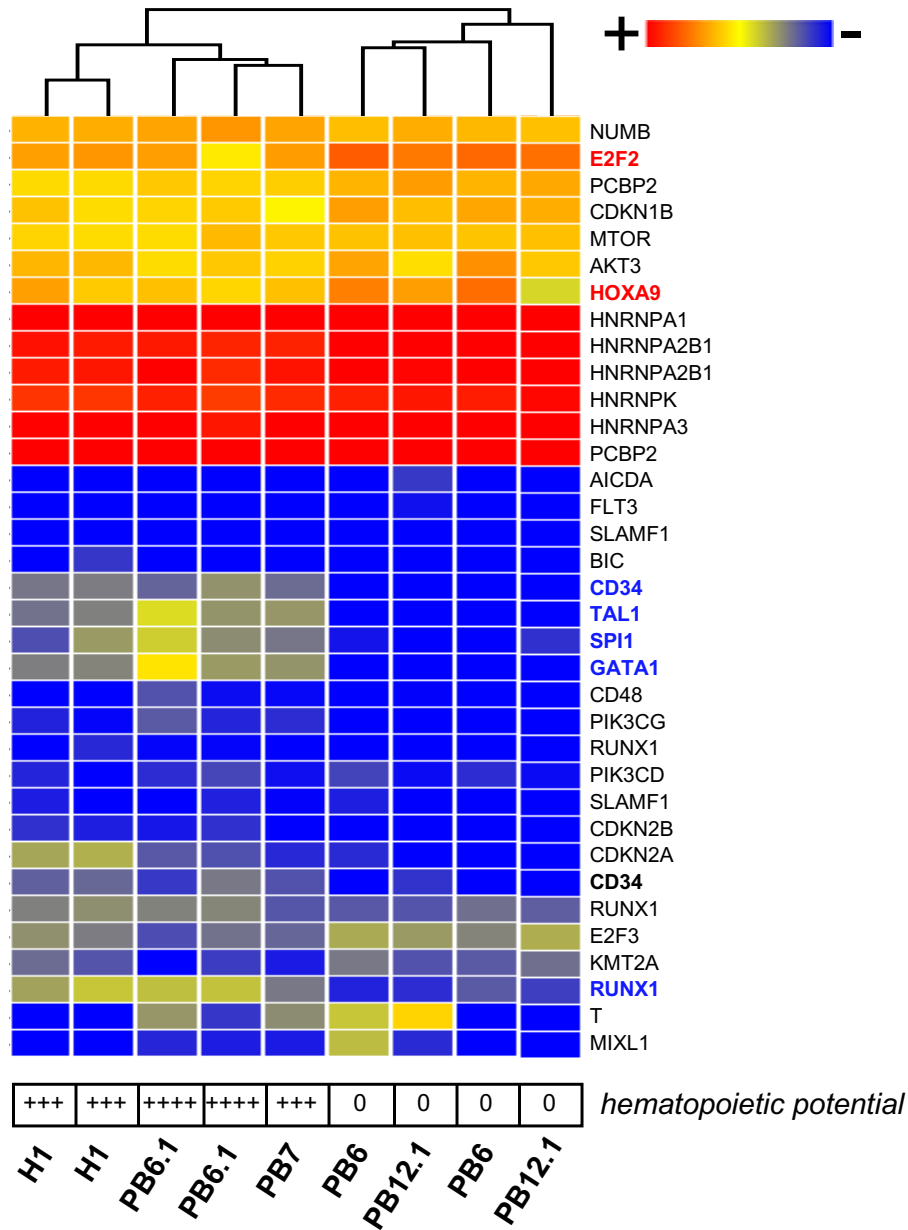

**Figure S1.** Unsupervised hierarchical clustering of hPSC-derived EBs according to the mRNA expression of hematopoietic lineage genes (microarray analysis). Hematopoietic-competent cells (H1, PB6.1, PB7) were separated from hematopoietic-deficient ones (PB6, PB12.1). In this experiment, all hPSCs were tested in duplicate, except PB7. Genes under-expressed or over-expressed in blood-deficient hPSCs are indicated in blue and red respectively (*related to Table S1*).

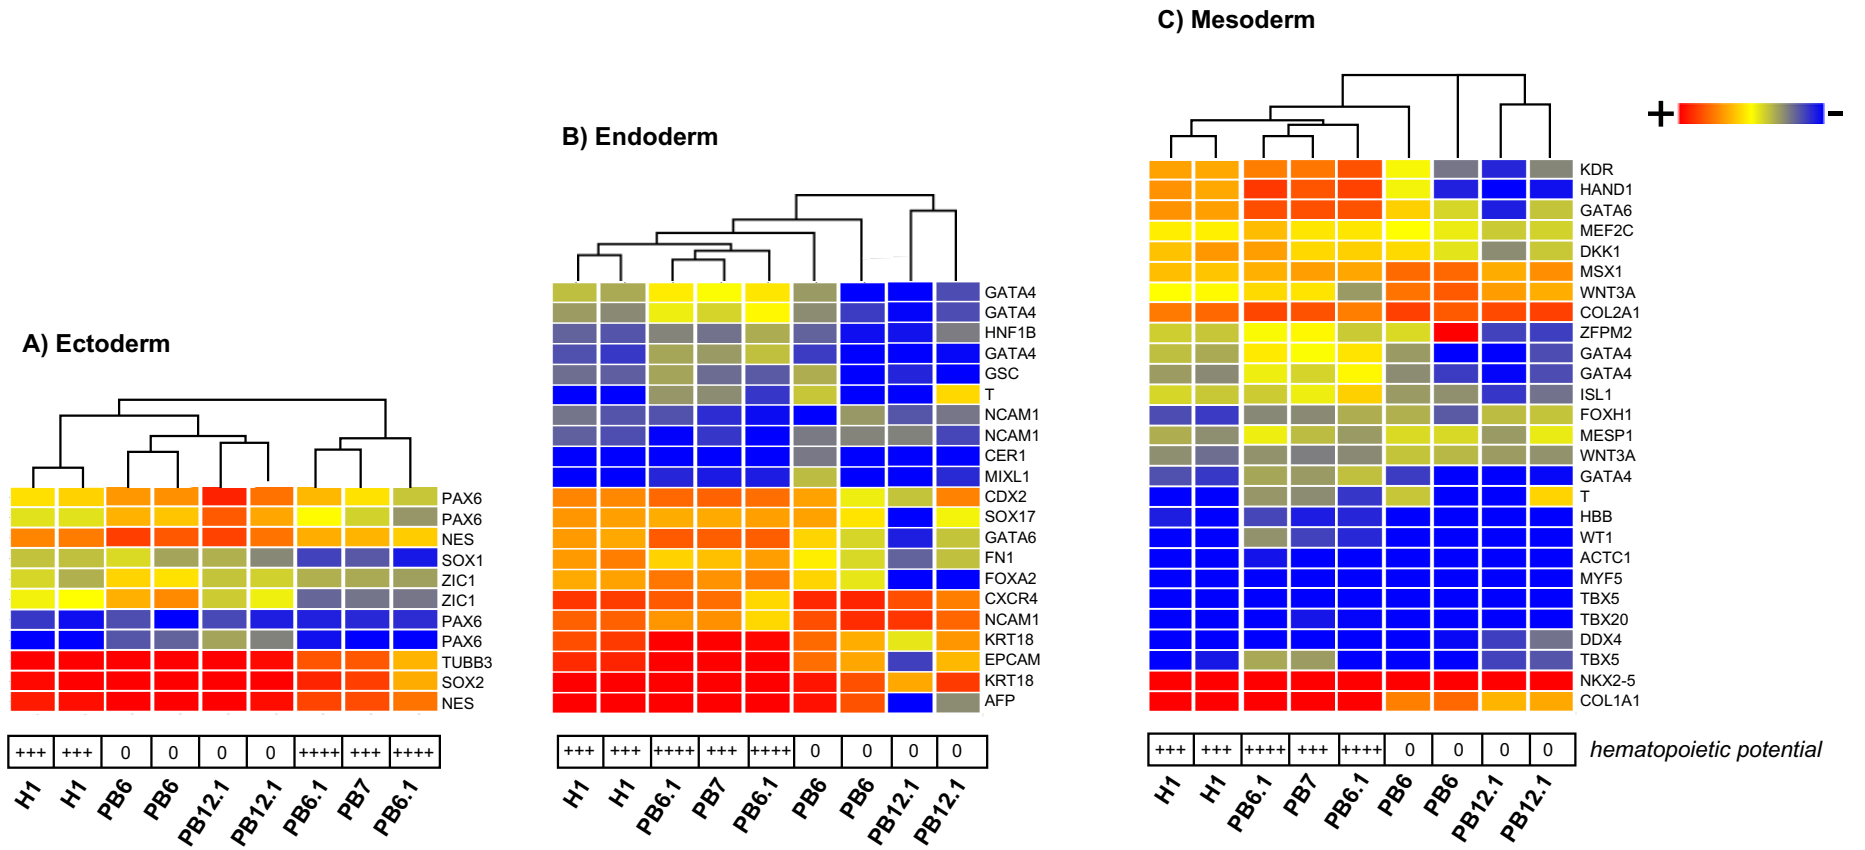

**Figure S2.** Unsupervised hierarchical clustering of hPSC-derived EBs according to the mRNA expression of germ layer differentiation genes (microarray analysis) Selected ectoderm (A), endoderm (B) and mesoderm (C) related genes differentially expressed between hematopoietic-competent (H1, PB6.1, PB7) and -deficient cells (PB6, PB12.1) are shown (related to Table S1).

### A) NODAL/ACTIVIN family schematic pathway

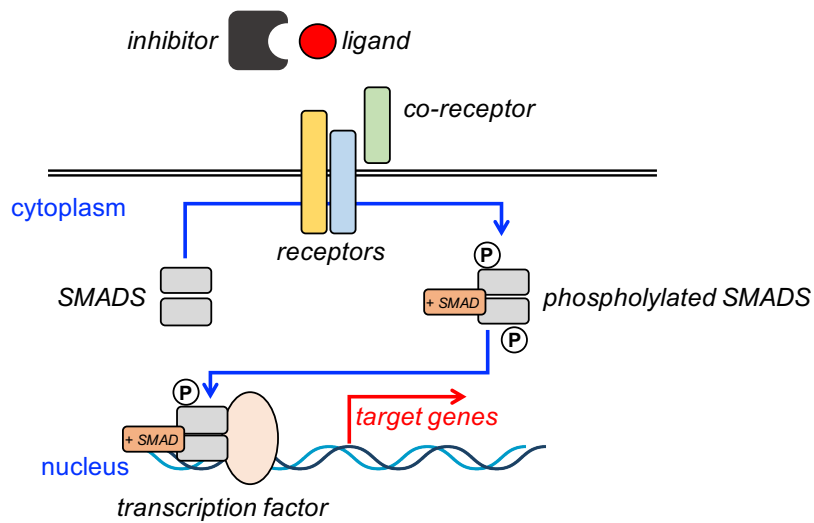

### B) Actors of NODAL/ACTIVIN signaling pathway

| Ligand                                        | Receptor                                                                                                    | Co-receptor                  | Inhibitor                                                              | Signal transduction factor | Additional transcription factor |
|-----------------------------------------------|-------------------------------------------------------------------------------------------------------------|------------------------------|------------------------------------------------------------------------|----------------------------|---------------------------------|
| <b>ACTIVIN</b> (1)                            | <b>ACVR1B</b> (1) (ALK4), <b>ACVR1C</b> (1) (ALK7) / <b>ACVR2A</b> (1) (ACTR2A), <b>ACVR2B</b> (1) (ACTR2B) |                              | <b>FST</b> (1) (FOLLISTATIN)                                           | SMAD 2, 3 (+ SMAD 4)       | <b>FOXH1</b> (2)                |
| <b>NODAL</b> (1,2)                            | <b>ACVR1B</b> (1) (ALK4), <b>ACVR1C</b> (1) (ALK7) / <b>ACVR2A</b> (1) (ACTR2A), <b>ACVR2B</b> (1) (ACTR2B) | <b>CRIPTO</b> (1,2) (TDGFH1) | <b>CER1</b> (1,2) (CERBERUS), <b>LEFTY1</b> (1,2), <b>LEFTY2</b> (1,2) | SMAD 2, 3 (+ SMAD 4)       | <b>FOXH1</b> (2)                |
| BMPs ( <b>BMP2</b> (1), <b>BMP4</b> (1), ...) | <b>BMPR2</b> (1) / <b>BMPR1A</b> (1) (ALK3), <b>BMPR1B</b> (1) (ALK6)                                       |                              |                                                                        | SMAD 1,5,8 (+ SMAD 4)      |                                 |

### C) Microarray analysis in day-16 EB cells

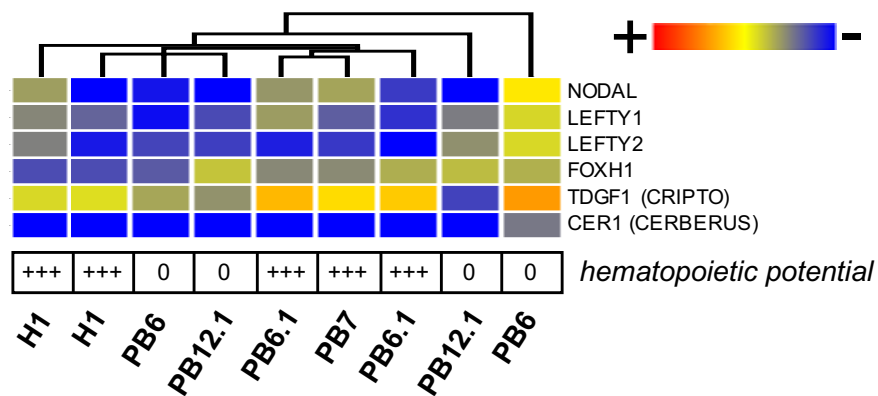

Figure S3. Cont.

## D) Quantitative RT-PCR experiments on hPSC lines at the pluripotent stage

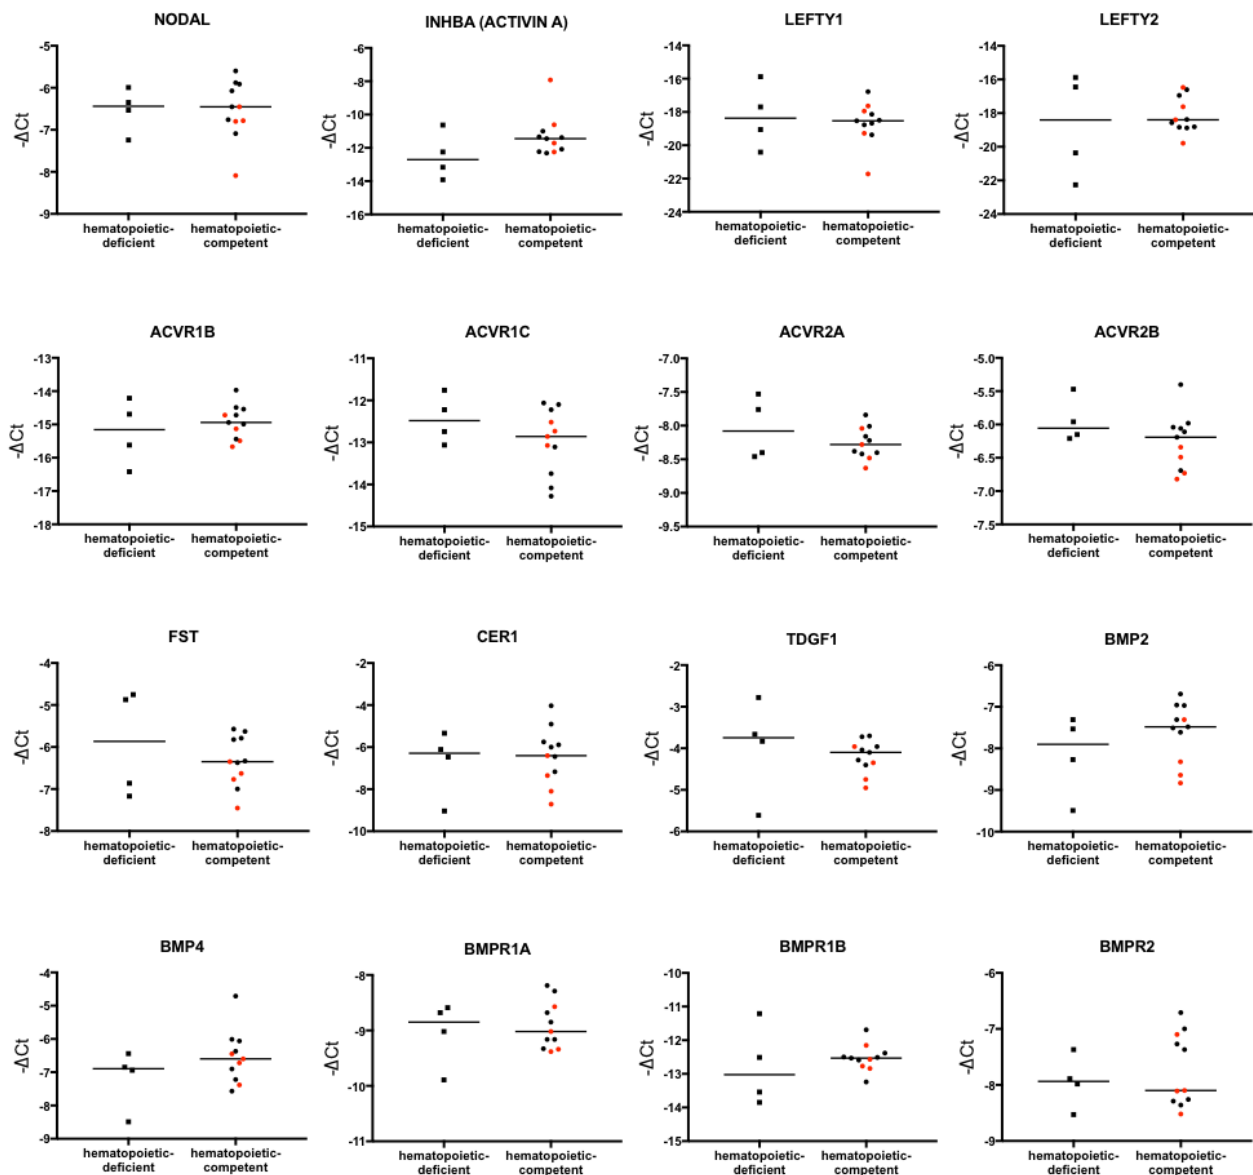

**Figure S3.** Analysis of the NODAL/ACTIVIN pathway by microarray and qRT-PCR experiments. A) A schematic representation, of the NODAL/ACTIVIN family pathway is shown. B) Several actors of this pathway (in red) were studied at the transcription level by qRT-PCR at the pluripotent stage (1) and/or microarray in hPSCs-derived EBs (2) C) The unsupervised clustering on H1, PB6, PB6.1, PB7 and PB12.1 cell lines (day 16 EBs) did not stratify hPSCs according to their hematopoietic potential (microarray analysis). D) The mRNA expression of several genes from the NODAL/ACTIVIN signaling pathway were also evaluated in the entire panel of 15 hPSC lines, at the pluripotency stage, by qRT-PCR experiments. No significant differential expression was observed between hematopoietic-deficient and -competent hPSCs. Human ES cells are represented in red and hiPSCs in black (*related to Tables S1-S2*).

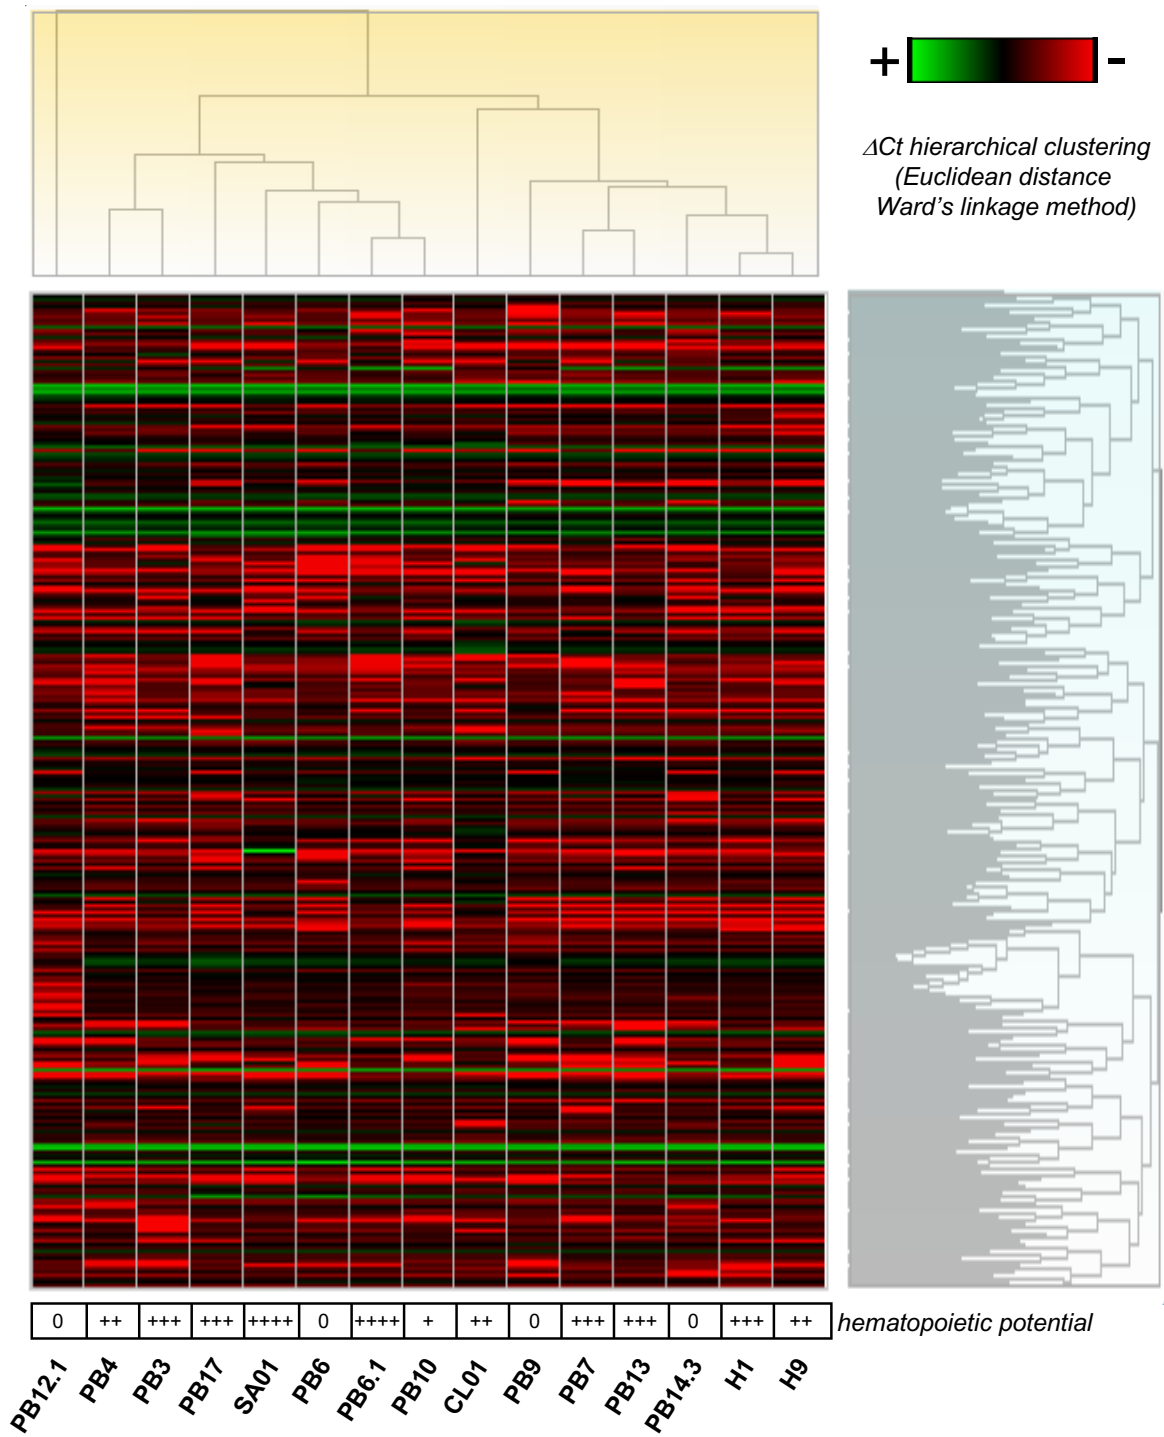

**Figure S4.** Unsupervised hierarchical clustering of hPSCs at the pluripotent stage according to the expression of 754 miRNAs (TLDA analysis). The unsupervised clustering did not distinguish hematopoietic-competent cells (SA01, CL01, H1, H9, PB3, PB4, PB6.1, PB7, PB10, PB13, PB17) from hematopoietic-deficient ones (PB6, PB9, PB12.1, PB14.3).

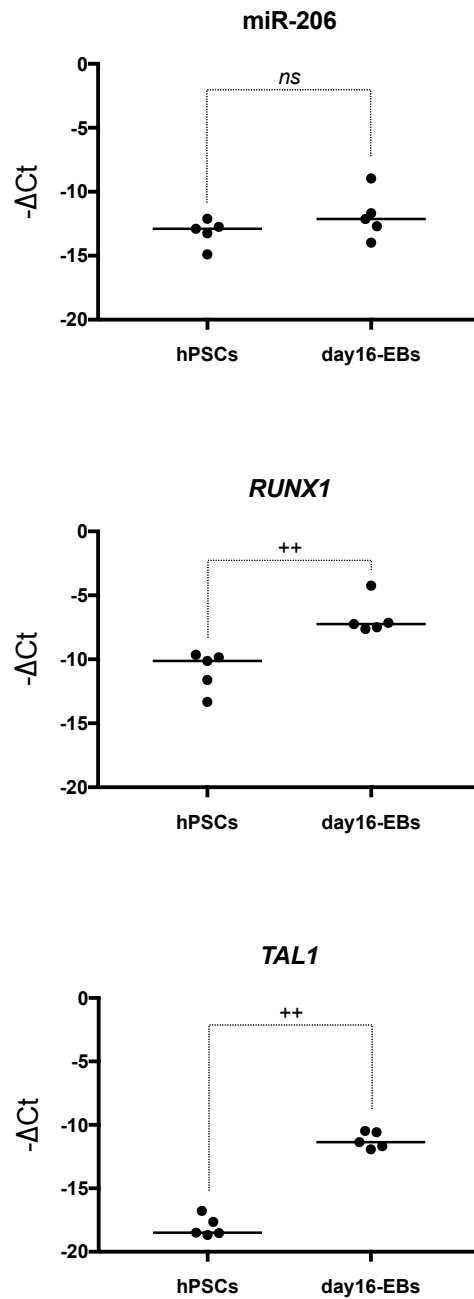

**Figure S5.** Real-time RT-PCR quantification of miR-206 and *RUNX1/TAL1* mRNAs in five hematopoietic-competent hPSCs and day-16 EBs (PB6.1, PB7, SA01, H1, H9). Expression levels are shown as vertical scatter dot plot with median and estimated by a  $-\Delta\text{Ct}$  calculation with  $\Delta\text{Ct} = \text{Ct miRNA} - \text{Ct RNU48}$  (miR-206) or  $\Delta\text{Ct} = \text{Ct Target} - \text{Ct GAPDH}$  (*RUNX1/TAL1*). p-values were calculated using the nonparametric 2-tailed Mann-Whitney U-test (ns not significant; +  $p < 0,05$ ; ++  $p < 0,01$ ; +++  $p < 0,001$ ).

**Table S1.** Selected genes analyzed from whole transcriptome data and by qRT-PCR (*related to Figures S1-S3*).

| Acronym             | Name                                                                    | Hematopoietic lineage marker gene | Germ layer marker gene |          |          | ACTIVIN/NODAL signaling pathway |
|---------------------|-------------------------------------------------------------------------|-----------------------------------|------------------------|----------|----------|---------------------------------|
|                     |                                                                         |                                   | ectoderm               | endoderm | mesoderm |                                 |
| <b>ACTC1</b>        | actin; alpha; cardiac muscle 1                                          |                                   |                        |          | X        |                                 |
| <b>ACVR1B</b>       | activin A receptor; type IB                                             |                                   |                        |          |          | X                               |
| <b>ACVR1C</b>       | activin A receptor; type IC                                             |                                   |                        |          |          | X                               |
| <b>ACVR2A</b>       | activin A receptor; type IIA                                            |                                   |                        |          |          | X                               |
| <b>ACVR2B</b>       | activin A receptor; type IIB                                            |                                   |                        |          |          | X                               |
| <b>AFP</b>          | alpha-fetoprotein                                                       |                                   |                        | X        |          |                                 |
| <b>AICDA (AID)</b>  | activation-induced cytidine deaminase                                   | X                                 |                        |          |          |                                 |
| <b>AKT3</b>         | v-akt murine thymoma viral oncogene homolog 3                           | X                                 |                        |          |          |                                 |
| <b>BIC (MIR155)</b> | microRNA 155                                                            | X                                 |                        |          |          |                                 |
| <b>BMP2</b>         | bone morphogenetic protein 2                                            |                                   |                        |          |          | X                               |
| <b>BMP4</b>         | bone morphogenetic protein 4                                            |                                   |                        |          |          | X                               |
| <b>BMPR1A</b>       | bone morphogenetic protein receptor, type IA                            |                                   |                        |          |          | X                               |
| <b>BMPR1B</b>       | bone morphogenetic protein receptor, type IB                            |                                   |                        |          |          | X                               |
| <b>BMPR2</b>        | bone morphogenetic protein receptor, type II                            |                                   |                        |          |          | X                               |
| <b>CD34</b>         | CD34 molecule                                                           | X                                 |                        |          |          |                                 |
| <b>CD48</b>         | CD34 molecule                                                           | X                                 |                        |          |          |                                 |
| <b>CDKN1B (P27)</b> | cyclin-dependent kinase inhibitor 1B                                    | X                                 |                        |          |          |                                 |
| <b>CDKN2A (P16)</b> | cyclin-dependent kinase inhibitor 2A                                    | X                                 |                        |          |          |                                 |
| <b>CDKN2B (P15)</b> | cyclin-dependent kinase inhibitor 2B                                    | X                                 |                        |          |          |                                 |
| <b>CDX2</b>         | caudal type homeobox 2                                                  |                                   |                        | X        |          |                                 |
| <b>CER1</b>         | cerberus 1 homolog; cysteine knot superfamily ( <i>Xenopus laevis</i> ) |                                   |                        | X        |          | X                               |
| <b>COL1A1</b>       | collagen; type I; alpha 1                                               |                                   |                        |          | X        |                                 |
| <b>COL2A1</b>       | collagen; type II; alpha 1                                              |                                   |                        |          | X        |                                 |
| <b>CXCR4</b>        | chemokine (C-X-C motif) receptor 4                                      |                                   |                        | X        |          |                                 |
| <b>DDX4</b>         | DEAD (Asp-Glu-Ala-Asp) box polypeptide 4                                |                                   |                        |          | X        |                                 |
| <b>DKK1</b>         | dickkopf homolog 1                                                      |                                   |                        |          | X        |                                 |
| <b>E2F2</b>         | E2F transcription factor 2                                              | X                                 |                        |          |          |                                 |
| <b>E2F3</b>         | E2F transcription factor 3                                              | X                                 |                        |          |          |                                 |
| <b>EPCAM</b>        | epithelial cell adhesion molecule                                       |                                   |                        | X        |          |                                 |
| <b>FLT3</b>         | fms-related tyrosine kinase 3                                           | X                                 |                        |          |          |                                 |
| <b>FN1</b>          | fibronectin 1                                                           |                                   |                        | X        |          |                                 |
| <b>FOXA2</b>        | forkhead box A2                                                         |                                   |                        | X        |          |                                 |
| <b>FOXH1</b>        | forkhead box H1                                                         |                                   |                        |          | X        | X                               |
| <b>FST</b>          | folliculin                                                              |                                   |                        |          |          | X                               |
| <b>GATA1</b>        | GATA binding protein 1                                                  | X                                 |                        |          |          |                                 |
| <b>GATA4</b>        | GATA binding protein 4                                                  |                                   |                        | X        | X        |                                 |
| <b>GATA6</b>        | GATA binding protein 6                                                  |                                   |                        | X        | X        |                                 |
| <b>GSC</b>          | goosecoid                                                               |                                   |                        | X        |          |                                 |
| <b>HAND1</b>        | heart and neural crest derivatives expressed 1                          |                                   |                        |          | X        |                                 |
| <b>HBB</b>          | hemoglobin, beta                                                        |                                   |                        |          | X        |                                 |
| <b>HNF1B</b>        | HNF1 homeobox B                                                         |                                   |                        | X        |          |                                 |
| <b>HNRNPA1</b>      | heterogeneous nuclear ribonucleoprotein A1                              | X                                 |                        |          |          |                                 |

Table S1. Cont.

| Acronym                             | Name                                                                 | Hematopoietic lineage marker gene | Germ layer marker gene |          |          | ACTIVIN/NODAL signaling pathway |
|-------------------------------------|----------------------------------------------------------------------|-----------------------------------|------------------------|----------|----------|---------------------------------|
|                                     |                                                                      |                                   | ectoderm               | endoderm | mesoderm |                                 |
| <b>HNRNPA2B1</b> ( <i>HNRNPA2</i> ) | heterogeneous nuclear ribonucleoprotein A2/B1                        | X                                 |                        |          |          |                                 |
| <b>HNRNPK</b>                       | heterogeneous nuclear ribonucleoprotein K                            | X                                 |                        |          |          |                                 |
| <b>HNRPA3</b>                       | heterogeneous nuclear ribonucleoprotein A3                           | X                                 |                        |          |          |                                 |
| <b>HOXA9</b>                        | homeobox A9                                                          | X                                 |                        |          |          |                                 |
| <b>INHBA</b> ( <i>ACTIVIN</i> )     | inhibin, beta A (activin A)                                          |                                   |                        |          |          | X                               |
| <b>ISL1</b>                         | ISL LIM homeobox 1                                                   |                                   |                        |          | X        |                                 |
| <b>KDR</b>                          | kinase insert domain receptor                                        |                                   |                        |          | X        |                                 |
| <b>KMT2A</b> ( <i>MLL</i> )         | lysine (K)-specific methyltransferase 2A                             | X                                 |                        |          |          |                                 |
| <b>KRT18</b>                        | keratin 18                                                           |                                   |                        | X        |          |                                 |
| <b>LEFTY1</b>                       | left-right determination factor 1                                    |                                   |                        |          |          | X                               |
| <b>LEFTY2</b>                       | left-right determination factor 2                                    |                                   |                        |          |          | X                               |
| <b>MEF2C</b>                        | myocyte enhancer factor 2C                                           |                                   |                        |          | X        |                                 |
| <b>MESP1</b>                        | mesoderm posterior 1 homolog (mouse)                                 |                                   |                        |          | X        |                                 |
| <b>MIXL1</b>                        | Mix1 homeobox-like 1                                                 | X                                 |                        | X        |          |                                 |
| <b>MSX1</b>                         | msh homeobox 1                                                       |                                   |                        |          | X        |                                 |
| <b>MTOR</b>                         | mechanistic target of rapamycin                                      | X                                 |                        |          |          |                                 |
| <b>MYF5</b>                         | myogenic factor 5                                                    |                                   |                        |          | X        |                                 |
| <b>NCAM1</b>                        | neural cell adhesion molecule 1                                      |                                   |                        | X        |          |                                 |
| <b>NES</b>                          | nestin                                                               |                                   | X                      |          |          |                                 |
| <b>NKX2-5</b>                       | NK2 Homeobox 5                                                       |                                   |                        |          | X        |                                 |
| <b>NODAL</b>                        | nodal homolog (mouse)                                                |                                   |                        |          |          | X                               |
| <b>NUMB</b>                         | numb homolog ( <i>Drosophila</i> )                                   | X                                 |                        |          |          |                                 |
| <b>PAX6</b>                         | paired box 6                                                         |                                   | X                      |          |          |                                 |
| <b>PCBP2</b> ( <i>HNRPE2</i> )      | poly(rC) binding protein 2                                           | X                                 |                        |          |          |                                 |
| <b>PIK3CD</b>                       | phosphatidylinositol-3-kinase; catalytic; delta polypeptide          | X                                 |                        |          |          |                                 |
| <b>PIK3CG</b>                       | phosphatidylinositol-3-kinase; catalytic; gamma polypeptide          | X                                 |                        |          |          |                                 |
| <b>RUNX1</b> ( <i>AML1</i> )        | runt-related transcription factor 1                                  | X                                 |                        |          |          |                                 |
| <b>SLAMF1</b> ( <i>CD150</i> )      | signalling lymphocytic activation molecule family member 1 (CD150)   | X                                 |                        |          |          |                                 |
| <b>SOX1</b>                         | SRY (sex determining region Y)-box 1                                 |                                   | X                      |          |          |                                 |
| <b>SOX17</b>                        | SRY (sex determining region y)-box 17                                |                                   |                        | X        |          |                                 |
| <b>SOX2</b>                         | SRY (sex determining region Y)-box 2                                 |                                   | X                      |          |          |                                 |
| <b>SPI1</b> ( <i>PU.1</i> )         | spleen focus forming virus (SFFV) proviral integration oncogene spi1 | X                                 |                        |          |          |                                 |
| <b>T</b>                            | brachyury homolog (mouse)                                            | X                                 |                        | X        | X        |                                 |
| <b>TAL1</b> ( <i>SCL</i> )          | T-cell acute lymphocytic leukemia 1                                  | X                                 |                        |          |          |                                 |
| <b>TBX20</b>                        | T-box 20                                                             |                                   |                        |          | X        |                                 |
| <b>TBX5</b>                         | T-box 5                                                              |                                   |                        |          | X        |                                 |
| <b>TDGF1</b> ( <i>CRIPTO1</i> )     | teratocarcinoma-derived growth factor 1                              |                                   | X                      |          |          | X                               |
| <b>TUBB3</b>                        | tubulin; beta 3                                                      |                                   | X                      |          |          |                                 |
| <b>WNT3A</b>                        | wingless-type MMTV integration site family, member 3A                |                                   |                        |          | X        |                                 |
| <b>WT1</b>                          | Wilms tumor 1                                                        |                                   |                        |          | X        |                                 |
| <b>ZFPM2</b>                        | zinc finger protein, multitype 2                                     |                                   |                        |          | X        |                                 |
| <b>ZIC1</b>                         | Zic family member 1 (odd-paired homolog; <i>Drosophila</i> )         |                                   | X                      |          |          |                                 |



**Table S2.** Primer list for qRT-PCR analysis of the NODAL/ACTIVIN signaling pathway (related to Figure S3).

| <b>Gene</b>                     | <b>Accession #</b> | <b>Forward primer (5'-3')</b> | <b>Reverse primer (5'-3')</b> |
|---------------------------------|--------------------|-------------------------------|-------------------------------|
| <b><i>GAPDH</i></b>             | NM_002046          | TGCACCACCAACTGCTTAGC          | GGCATGGACTGTGGTCATGAG         |
| <b><i>ACVR1B (ALK4)</i></b>     | NM_004302          | GAGGAAATGCGAAAGGTTGT          | AGCTGGGAGAGGGTCTTCTT          |
| <b><i>ACVR1C (ALK7)</i></b>     | NM_145259          | TGCCTTCAGATCCCTCGATA          | GCATACCAACACTCACGCATT         |
| <b><i>ACVR2A</i></b>            | NM_001216          | GAGGTACATGGCTCCAGAGG          | TTTCCTCCTCAAATGGCAAC          |
| <b><i>ACVR2B</i></b>            | NM_001106          | AAGCCGTCTATTGCCACAG           | GAGCCATGTACCGTCTCGTG          |
| <b><i>BMP2</i></b>              | NM_001200          | CCCAGCGTGAAGAGAGAGAC          | GGAAGCAGCAACGCTAGAAG          |
| <b><i>BMP4</i></b>              | NM_001202          | AGCCATTCCGTAGTGCCATC          | CGACCATCAGCATTCCGGTTA         |
| <b><i>BMPR1A (ALK3)</i></b>     | NM_004329          | CTGGGGTCCGGACTTATGA           | TGCTTTCTTACGACTCCTCCA         |
| <b><i>BMPR1B (ALK6)</i></b>     | NM_001203          | TCATCCTTTGGGAGGTTGCT          | GGGTCACTGGGCACTAGGTC          |
| <b><i>BMPR2</i></b>             | NM_001204          | AAAGCCCAGAAGAGCACAGA          | CTTCACAGTCCAGCGATTCA          |
| <b><i>CER1 (CERBERUS)</i></b>   | NM_005454          | CTTCTCAGGGGGTCATCTTG          | TCCCAAAGCAAAGGTTGTTC          |
| <b><i>CRIPTO (TDGF1)</i></b>    | NM_003212          | TAACGCCTCTTTTCCCCCTAAT        | TCATCTCTGAAGGCCAGGTATC        |
| <b><i>FST (FOLLISTATIN)</i></b> | NM_006350          | GGGAATGATGGAGTCACCTACT        | CCAACCTTGAAATCCCATAAAC        |
| <b><i>INHBA (ACTIVIN)</i></b>   | NM_002192          | TGAATGAACTTATGGAGCAGACC       | GGGACTTTTAGGAAGAGCCAGA        |
| <b><i>LEFTY1</i></b>            | NM_020997          | CCAGTACGTGGCCCTGCT            | CTGCTCCATGCCGAACAC            |
| <b><i>LEFTY2</i></b>            | NM_003240          | CGTGAGGGCCCAGTATGTAGT         | CTGCTCCATGCCGAACAC            |
| <b><i>NODAL</i></b>             | NM_018055          | GAGGAGTTTCATCCGACCAA          | GCACTCTGCCATTATCCACA          |

**Table S3.** Hematopoiesis-related miRNAs selected for kinetic expression analysis (*related to Figure 2*).

| miRNA<br>(miRBase ID)         | expressed in |      |                        |                |              |             |              |                         |         |         |                               | References                                                                                                    |
|-------------------------------|--------------|------|------------------------|----------------|--------------|-------------|--------------|-------------------------|---------|---------|-------------------------------|---------------------------------------------------------------------------------------------------------------|
|                               | PSCs         | HSCs | MYELOID<br>PROGENITORS | Megakaryocytes | Erythrocytes | Macrophages | Granulocytes | LYMPHOID<br>PROGENITORS | T cells | B cells | HEMATOLOGICAL<br>MALIGNANCIES |                                                                                                               |
| hsa-miR-125b-5p               |              | X    | X                      |                |              |             |              | X                       |         |         | X                             | Ooi et al. Proc Natl Acad Sci U S A 2010;<br>Shaham et al. Leukemia 2012                                      |
| hsa-miR-142-3p                |              | X    |                        |                |              |             |              | X                       | X       |         | X                             | Dahlhaus et al. Neoplasma 2013                                                                                |
| hsa-miR-150-5p                |              |      | X                      | X              |              |             |              | X                       | X       | X       | X                             | Garzon et al. Curr Opin Hematol 2008; Vasilatou<br>et al. Eur J Haematol 2010; Yeh et al. Mol<br>Cancer 2016  |
| hsa-miR-155-5p                | X            | X    | X                      | X              | X            | X           | X            | X                       | X       | X       | X                             | Georgantas et al. Proc Natl Acad Sci U S A<br>2007; Mayani Stem Cells Dev 2010; Yeh et al.<br>Mol Cancer 2016 |
| hsa-miR-223-3p                |              |      | X                      |                |              |             | X            |                         |         |         | X                             | Johnnidis et al. Nature 2008; Fazi et al. Cancer<br>Cell 2007; Yeh et al. Mol Cancer 2016                     |
| hsa-miR-302-3p <sup>(1)</sup> | X            |      |                        |                |              |             |              |                         |         |         |                               | Subramanyam et al. Nat Biotechnol 2011;<br>Leonardo et al. Nat Cell Biol 2012                                 |

PSCs, pluripotent stem cells; HSCs, hematopoietic stem cells

<sup>(1)</sup> primer for miR-302 recognizes all four isoforms (see also Table S7).

**Table S4.** miRNAs differentially expressed between hematopoietic-deficient and hematopoietic-competent hPSCs (TLDA experiments, related to Figure 3A).

| miRNA<br>(miRBase ID) | hPSCs tested<br>(ES + iPS<br>or iPS alone) | Fold change in miRNA expression<br>(hematopoietic-competent<br>vs -deficient hPSCs) | Statistical significance |                                |
|-----------------------|--------------------------------------------|-------------------------------------------------------------------------------------|--------------------------|--------------------------------|
|                       |                                            |                                                                                     | LiMMa                    | LiMMa<br>Bonferroni correction |
| hsa-miR-105-5p        | ES + iPS                                   | X 0.066                                                                             | +                        |                                |
|                       | iPS alone                                  | X 0.054                                                                             | +                        |                                |
| hsa-miR-106a-3p       | iPS alone                                  | X 9.2                                                                               | +                        |                                |
| hsa-miR-122-5p        | ES + iPS                                   | X 83.3                                                                              | ++                       |                                |
|                       | iPS alone                                  | X 142.8                                                                             | ++                       |                                |
| hsa-miR-135b-3p       | ES + iPS                                   | X 0.4                                                                               | +                        |                                |
| <b>hsa-miR-206</b>    | <b>ES + iPS</b>                            | <b>X 0.043</b>                                                                      | <b>+++</b>               | <b>++</b>                      |
|                       | <b>iPS alone</b>                           | <b>X 0.041</b>                                                                      | <b>+++</b>               | <b>++</b>                      |
| hsa-miR-296-3p        | ES + iPS                                   | X 1.8                                                                               | ++                       |                                |
|                       | iPS alone                                  | X 1.9                                                                               | +                        |                                |
| hsa-miR-335-5p        | ES + iPS                                   | X 1.9                                                                               | +                        |                                |
|                       | iPS alone                                  | X 2.1                                                                               | +                        |                                |
| hsa-miR-492           | ES + iPS                                   | X 0.48                                                                              | +                        |                                |
| hsa-miR-515-3p (1)    | ES + iPS                                   | X 3.5                                                                               | +                        |                                |
| hsa-miR-520a-3p (1)   | ES + iPS                                   | X 13.0                                                                              | ++                       |                                |
|                       | iPS alone                                  | X14.1                                                                               | +                        |                                |
| hsa-miR-622           | ES + iPS                                   | X 0.11                                                                              | +                        |                                |
|                       | iPS alone                                  | X 0.058                                                                             | +                        |                                |

(1): member of the C19MC cluster located within chromosome 19.

ES + iPS, analysis of the entire panel of 15 hPSC lines; iPS alone, analysis restricted to hiPSC lines.

+ p<0,05; ++ p<0,01; +++ p<0,001.

LiMMa, Linear models for microarrays.

**Table S5.** miRNAs differentially expressed between high and poor hematopoietic-competent hPSCs (TLDA experiments, related to Figure 3B).

| miRNA<br>(miRBase ID)      | Fold change in miRNA expression<br>(High hematopoietic-competent<br>vs poor hematopoietic-competent hPSCs) | Statistical significance |                                |
|----------------------------|------------------------------------------------------------------------------------------------------------|--------------------------|--------------------------------|
|                            |                                                                                                            | LiMMa                    | LiMMa<br>Bonferroni correction |
| hsa-miR-15b-3p             | X 0.48                                                                                                     | +                        |                                |
| hsa-miR-22-5p              | X 0.42                                                                                                     | +                        |                                |
| hsa-miR-34c-5p             | X 3.1                                                                                                      | ++                       |                                |
| hsa-miR-138-5p             | X 0.62                                                                                                     | +                        |                                |
| hsa-miR-190a-5p            | X 4.8                                                                                                      | +                        |                                |
| hsa-miR-192-3p             | X 25.0                                                                                                     | ++                       |                                |
| hsa-miR-328-3p             | X 0.45                                                                                                     | +                        |                                |
| hsa-miR-345-5p             | X 0.52                                                                                                     | +                        |                                |
| hsa-miR-378a-5p            | X 7.6                                                                                                      | +                        |                                |
| <b>hsa-miR-520a-3p (1)</b> | <b>X 33.2</b>                                                                                              | <b>++</b>                | <b>+</b>                       |
| hsa-miR-941                | X 13.0                                                                                                     | +                        |                                |

(1): member of the C19MC cluster located within chromosome 19.

+ p<0,05; ++ p<0,01; +++ p<0,001.

LiMMa, Linear models for microarrays.

**Table S6.** Genes potentially up-regulated by a reduced expression of miR-206 in the context of hematopoietic-competent hPSC (related to Figure 4).

| Target gene    |                                                  | p-values<br>(Up) | Fold Change<br>Hematopoietic-competent<br>vs -deficient hPSCs | Biological process                          |                                                                               |
|----------------|--------------------------------------------------|------------------|---------------------------------------------------------------|---------------------------------------------|-------------------------------------------------------------------------------|
| <b>ABCA1</b>   | ATP binding cassette subfamily A member 1        | 0.0044           | X 2.48                                                        | Transporter activity                        | Transport                                                                     |
| <b>ANXA2</b>   | annexin A2                                       | 0.0098           | X 2.25                                                        | Calcium ion binding                         | Signal transduction ; Cell communication                                      |
| <b>CA12</b>    | carbonic anhydrase 12                            | 0.0033           | X 2.65                                                        | Catalytic activity                          | Metabolism ; Energy pathways                                                  |
| <b>CDR1</b>    | cerebellar degeneration related protein 1        | 0.00557          | X 2.60                                                        | Molecular function unknown                  | Biological_process unknown                                                    |
| <b>COL19A1</b> | collagen type XIX alpha 1 chain                  | 0.00934          | X 1.86                                                        | Extracellular matrix structural constituent | Cell growth and/or maintenance                                                |
| <b>CSF1</b>    | colony stimulating factor 1                      | 0.018            | X 2.19                                                        | Cytokine activity                           | Cell proliferation ; Cell differentiation ; Signal transduction ; Hemopoiesis |
| <b>DLG2</b>    | discs large MAGUK scaffold protein 2             | 0.016            | X 3.86                                                        | Cell adhesion molecule activity             | Cell communication ; Signal transduction                                      |
| <b>ECM2</b>    | extracellular matrix protein 2                   | 8.58E-5          | X 5.08                                                        | Extracellular matrix structural constituent | Cell growth and/or maintenance                                                |
| <b>EIF4E</b>   | eukaryotic translation initiation factor 4E      | 0.0489           | X 1.68                                                        | Translation regulator activity              | Protein metabolism                                                            |
| <b>ELMO1</b>   | engulfment and cell motility 1                   | 0.0146           | X 2.01                                                        | Motor activity                              | Cell growth and/or maintenance                                                |
| <b>ENTPD7</b>  | ectonucleoside triphosphate diphosphohydrolase 7 | 0.0233           | X 1.88                                                        | Hydrolase activity                          | Metabolism ; Energy pathways                                                  |
| <b>FAM91A1</b> | family with sequence similarity 91 member A1     | 0.0468           | X 1.65                                                        | Molecular function unknown                  | Biological process unknown                                                    |
| <b>FN1</b>     | fibronectin 1                                    | 0.0181           | X 2.04                                                        | Extracellular matrix structural constituent | Cell growth and/or maintenance                                                |
| <b>FZD4</b>    | frizzled class receptor 4                        | 0.0255           | X 1.85                                                        | G-protein coupled receptor activity         | Cell communication ; Signal transduction                                      |
| <b>GCH1</b>    | GTP cyclohydrolase 1                             | 0.011            | X 2.17                                                        | Hydrolase activity                          | Metabolism ; Energy pathways                                                  |
| <b>GDF6</b>    | growth differentiation factor 6                  | 0.0291           | X 1.44                                                        | Growth factor activity                      | Cell communication ; Signal transduction                                      |

Table S6. *Cont.*

| Target gene            |                                                         | p-values<br>(Up) | Fold Change<br>Hematopoietic-competent<br>vs -deficient hPSCs | Biological process                           |                                                                              |
|------------------------|---------------------------------------------------------|------------------|---------------------------------------------------------------|----------------------------------------------|------------------------------------------------------------------------------|
| <b>GLS</b>             | glutaminase                                             | 0.011            | X 2.16                                                        | Hydrolase activity                           | Metabolism ; Energy pathways                                                 |
| <b>GUCY1A2</b>         | guanylate cyclase 1 soluble subunit alpha 2             | 0.00422          | X 2.56                                                        | Guanylate cyclase activity                   | Cell communication ; Signal transduction                                     |
| <b>HNF4A</b>           | hepatocyte nuclear factor 4 alpha                       | 8.58E-5          | X 8.56                                                        | Ligand-dependent nuclear receptor activity   | Cell communication ; Signal transduction                                     |
| <b>HNRNPU</b>          | heterogeneous nuclear ribonucleoprotein U               | 0.0438           | X 1.68                                                        | RNA binding                                  | Regulation of nucleobase, nucleoside, nucleotide and nucleic acid metabolism |
| <b>KANK4</b>           | KN motif and ankyrin repeat domains 4                   | 0.009            | X 2.27                                                        | Molecular function unknown                   | Biological process unknown                                                   |
| <b>KCNJ15</b>          | potassium voltage-gated channel subfamily J member 15   | 0.0163           | X 1.80                                                        | Inward rectifier channel                     | Transport                                                                    |
| <b>KDEL2</b>           | KDEL endoplasmic reticulum protein retention receptor 2 | 0.0219           | X 1.91                                                        | Transporter activity                         | Transport                                                                    |
| <b>KIAA0040</b>        | KIAA0040                                                | 4.77E-4          | X 3.56                                                        | Molecular function unknown                   | Biological process unknown                                                   |
| <b>JCAD (KIAA1462)</b> | junctional cadherin 5 associated                        | 0.009            | X 2.31                                                        | Molecular function unknown                   | Biological process unknown                                                   |
| <b>PLPPR4 (LPPR4)</b>  | phospholipid phosphatase related 4                      | 0.005            | X 2.47                                                        | Lipid phosphatase activity                   | Cell communication ; Signal transduction                                     |
| <b>MAPKBP1</b>         | mitogen-activated protein kinase binding protein 1      | 0.0234           | X 1.86                                                        | Molecular function unknown                   | Biological process unknown                                                   |
| <b>METTL7A</b>         | methyltransferase like 7A                               | 2.86E-4          | X 3.90                                                        | Methyltransferase activity                   | Metabolism; Energy pathways                                                  |
| <b>MPP7</b>            | membrane palmitoylated protein 7                        | 0.0298           | X 1.82                                                        | Receptor signaling complex scaffold activity | Cell communication ; Signal transduction                                     |
| <b>MR1</b>             | major histocompatibility complex, class I-related       | 0.0032           | X 2.62                                                        | MHC class I receptor activity                | Immune response                                                              |
| <b>MYOCD</b>           | myocardin                                               | 8.58E-5          | X 7.36                                                        | Transcription factor activity                | Regulation of nucleobase, nucleoside, nucleotide and nucleic acid metabolism |
| <b>NAALADL1</b>        | N-acetylated alpha-linked acidic dipeptidase like 1     | 0.0117           | X 2.16                                                        | Dipeptidase activity                         | Biological_process unknown                                                   |

Table S6. *Cont.*

| Target gene     |                                               | p-values<br>(Up) | Fold Change<br>Hematopoietic-competent<br>vs -deficient hPSCs | Biological process                           |                                                                                        |
|-----------------|-----------------------------------------------|------------------|---------------------------------------------------------------|----------------------------------------------|----------------------------------------------------------------------------------------|
| <b>NR1H3</b>    | nuclear receptor subfamily 1 group H member 3 | 0.0281           | X 1.82                                                        | Ligand-dependent nuclear receptor activity   | Cell communication ; Signal transduction                                               |
| <b>OSTF1</b>    | osteoclast stimulating factor 1               | 0.00357          | X 2.56                                                        | Receptor signaling complex scaffold activity | Cell communication ; Signal transduction                                               |
| <b>PAX6</b>     | paired box 6                                  | 0.0478           | X 1.57                                                        | Transcription factor activity                | Regulation of nucleobase, nucleoside, nucleotide and nucleic acid metabolism           |
| <b>PDGFA</b>    | platelet derived growth factor subunit A      | 0.00381          | X 2.65                                                        | Growth factor activity                       | Cell proliferation ; Cell surface receptor linked signal transduction ; Cell migration |
| <b>RABGAP1L</b> | RAB GTPase activating protein 1 like          | 0.0075           | X 2.23                                                        | GTPase activator activity                    | Biological process unknown                                                             |
| <b>RUNX1</b>    | runt related transcription factor 1           | 0.0001           | X 4.5                                                         | Transcription factor activity                | Regulation of nucleobase, nucleoside, nucleotide and nucleic acid metabolism           |
| <b>SCD</b>      | stearoyl-CoA desaturase                       | 0.0428           | X 1.69                                                        | Oxidoreductase activity                      | Metabolism ; Energy pathways                                                           |
| <b>SLC15A2</b>  | solute carrier family 15 member 2             | 0.00435          | X 2.59                                                        | Auxiliary transport protein activity         | Transport                                                                              |
| <b>SLC16A3</b>  | solute carrier family 16 member 3             | 0.00563          | X 2.52                                                        | Auxiliary transport protein activity         | Transport                                                                              |
| <b>SLC25A30</b> | solute carrier family 25 member 30            | 0.0175           | X 1.93                                                        | Transporter activity                         | Transport                                                                              |
| <b>SLC31A1</b>  | solute carrier family 31 member 1             | 0.0419           | X 1.75                                                        | Transporter activity                         | Transport                                                                              |
| <b>SLC35B3</b>  | solute carrier family 35 member B3            | 0.0415           | X 1.72                                                        | Auxiliary transport protein activity         | Transport                                                                              |
| <b>SLC44A1</b>  | solute carrier family 44 member 1             | 0.034            | X 1.74                                                        | Molecular function unknown                   | Transport                                                                              |
| <b>SLC45A4</b>  | solute carrier family 45 member 4             | 0.0452           | X 1.71                                                        | Molecular function unknown                   | Transport                                                                              |
| <b>SLC6A13</b>  | solute carrier family 6 member 13             | 0.0183           | X 2.01                                                        | Auxiliary transport protein activity         | Transport                                                                              |
| <b>SLC7A11</b>  | solute carrier family 7 member 11             | 0.0263           | X 1.82                                                        | Auxiliary transport protein activity         | Transport                                                                              |

Table S6. *Cont.*

| Target gene      |                                                                   | p-values<br>(Up) | Fold Change<br>Hematopoietic-competent<br>vs -deficient hPSCs | Biological process                         |                                                                              |
|------------------|-------------------------------------------------------------------|------------------|---------------------------------------------------------------|--------------------------------------------|------------------------------------------------------------------------------|
| <b>SLC7A2</b>    | solute carrier family 7 member 2                                  | 2.67E-4          | X 4.15                                                        | Auxiliary transport protein activity       | Transport                                                                    |
| <b>SPATS2L</b>   | spermatogenesis associated serine rich 2 like                     | 0.037            | X 1.74                                                        | Molecular function unknown                 | Biological process unknown                                                   |
| <b>SPTLC3</b>    | serine palmitoyltransferase long chain base subunit 3             | 0.00143          | X 3.25                                                        | Transferase activity                       | Biological process unknown                                                   |
| <b>STC2</b>      | stanniocalcin 2                                                   | 0.04             | X 1.77                                                        | Hormone activity                           | Cell communication ; Signal transduction                                     |
| <b>TAL1</b>      | TAL bHLH transcription factor 1, erythroid differentiation factor | 9.54E-6          | X 6.29                                                        | Transcription factor activity              | Regulation of nucleobase, nucleoside, nucleotide and nucleic acid metabolism |
| <b>TBX18</b>     | T-box 18                                                          | 0.00334          | X 2.75                                                        | Transcription factor activity              | Transcription                                                                |
| <b>TCF7L2</b>    | transcription factor 7 like 2                                     | 0.0427           | X 1.73                                                        | Transcription factor activity              | Regulation of nucleobase, nucleoside, nucleotide and nucleic acid metabolism |
| <b>THRB</b>      | thyroid hormone receptor beta                                     | 0.0299           | X 1.82                                                        | Ligand-dependent nuclear receptor activity | Cell communication ; Signal transduction                                     |
| <b>TMEM120B</b>  | transmembrane protein 120B                                        | 0.0426           | X 1.71                                                        | Molecular function unknown                 | Biological process unknown                                                   |
| <b>TPK1</b>      | thiamin pyrophosphokinase 1                                       | 9.54E-6          | X 6.16                                                        | Catalytic activity                         | Metabolism ; Energy pathways                                                 |
| <b>TPM3</b>      | tropomyosin 3                                                     | 0.0316           | X 1.79                                                        | Cytoskeletal protein binding               | Cell growth and/or maintenance                                               |
| <b>TSPAN9</b>    | tetraspanin 9                                                     | 0.0214           | X 1.91                                                        | Cell adhesion molecule activity            | Cell communication ; Signal transduction                                     |
| <b>UHRF1BP1L</b> | UHRF1 binding protein 1 like                                      | 0.0219           | X 1.92                                                        | Molecular function unknown                 | Biological process unknown                                                   |
| <b>ZC3HAV1</b>   | zinc finger CCCH-type containing, antiviral 1                     | 0.004            | X 3.18                                                        | Defense/immunity protein activity          | Immune response                                                              |



**Table S7.** Primer list for qRT-PCR analysis of hematopoiesis-related miRNAs (*related to Figure 2*).

| <b>miRNA name</b>                   | <b>primer sequence (5'-3')</b> |
|-------------------------------------|--------------------------------|
| <b>hsa-miR-125b-5p</b>              | TTGTTTCCCTGAGACCCTAACTTG       |
| <b>hsa-miR-142-3p</b>               | GGGTGGTTGTAGTGTTCCTACT         |
| <b>hsa-miR-150-5p</b>               | AACCTGATCTCCCAACCCTTGTA        |
| <b>hsa-miR-155-5p</b>               | GGGTCTTAATGCTAATCGTGATAGG      |
| <b>hsa-miR-223-3p</b>               | CCACGTCTGTCAGTTTGTCAAA         |
| <b>hsa-miR-302-3p<sup>(1)</sup></b> | GGTTAAGTGCTTCCATGTTT           |

<sup>(1)</sup> primer for miR-302 recognizes all four isoforms (a/b/c/d)
